# Supplementary material for: Atlases of cognition with large-scale human brain mapping
Source: PLoS Comput Biol. 2018 Nov 29;14(11):e1006565. doi: 10.1371/journal.pcbi.1006565 (PMC6289578; doi:10.1371/journal.pcbi.1006565)
Supplement: S1 Table — The subject-level maps output by our preprocessing and first-level analysis have been uploaded to NeuroVault, for reproducibility of the analysis. These maps form the input of our analytic scheme. All the subject-level statistical maps that we computed as part of our preprocessing are available on http://neurovault.org/collections/1952. (XLSX) [file pcbi.1006565.s016.xlsx]

## Sheet: Sheet1
Internal name	ref
HCP release 1	[1]
amalric2016math	[2]
cauvet2012muslang	[3,4]
devauchelle2009sentence	[5]
ds001	[6]
ds002	[7]
ds003	[8,9]
ds007	[10]
ds008	[11]
ds009	[12]
ds011	[13]
ds017a	[14]
ds051	[15,16]
ds052	[17]
ds101	[18]
ds102	[19]
ds105	[20]
ds107	[21]
ds108	[22]
ds109	[23]
ds110	[24]
ds114	[25]
gauthier2012exp1	[26]
gauthier2012exp2	[26]
biomag2014faces	[27]
knops2009recruitment	[28]
pinel2007fast	[29]
pinel2013twins	[30]
bzdok2016formal	[31]
vagharchakian2012temporal	[32]
